# Supplementary material for: Influence of internal electrostatics on reduction potentials in amine-ligated bimetallic copper complexes
Source: Royal Society of Chemistry journal article supplement (doi:10.1039/d4cp04569f), 2025-01-01
Supplement: d4cp04569f1.pdf [file d4cp04569f1.pdf]

**Supporting Information for**  
**Influence of Internal Electrostatics on Reduction Potentials in**  
**Amine-ligated Bimetallic Copper Complexes**

Prateek Saini, Shubham Gupta and Srinivasan Ramakrishnan\*

Department of Chemistry, Indian Institute of Technology Bombay, Powai, Mumbai-400076

\*sriniramk@iitb.ac.in

| S. No. | Table of Contents                                                            | Page No. |
|--------|------------------------------------------------------------------------------|----------|
| 1.     | Spin Density Plots for $[\text{Cu}_2\text{L}_2\text{B}_n]^{4+}$              | S2-S6    |
| 2.     | Computational Results for $[\text{CuZnL}_2\text{B}_n]^{4+}$                  | S6-S7    |
| 3.     | Spin Density Plots for $[\text{CuZnL}_2\text{B}_n]^{4+}$                     | S8-S9    |
| 4.     | Supplementary Computational Results: Effect of changes to ligand environment | S10-S11  |
| 5.     | Crystallographic Information                                                 | S11-S12  |
| 6.     | Characterization (HRMS, FTIR, scXRD)                                         | S13-S16  |
| 7.     | Benchmarking of Reduction Potential Calculations Against Known Systems       | S17-S18  |
| 8.     | Supplementary Cyclic Voltammetry Data                                        | S18      |
| 9.     | Supplementary Computational Results: Dielectric and Functional Dependence    | S19      |

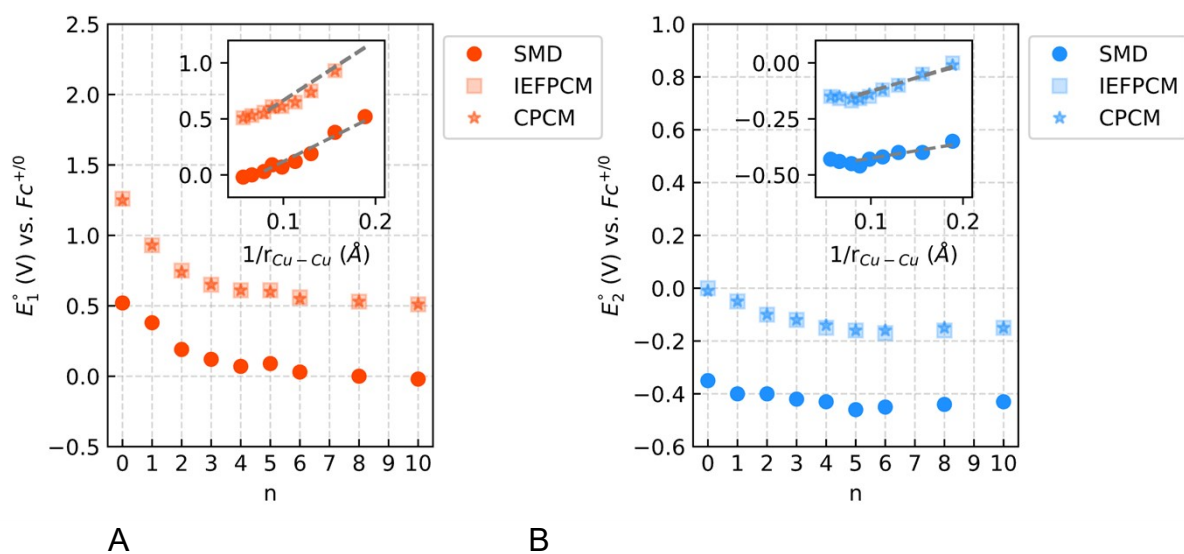

**Figure S1.** DFT-computed redox potentials as a function of the number of carbons in the diamine linker ( $n$ ) in the (A)  $E_1^\circ$  (B)  $E_2^\circ$  with SMD, IEFPCM, CPCM ( $CH_3CN$ )

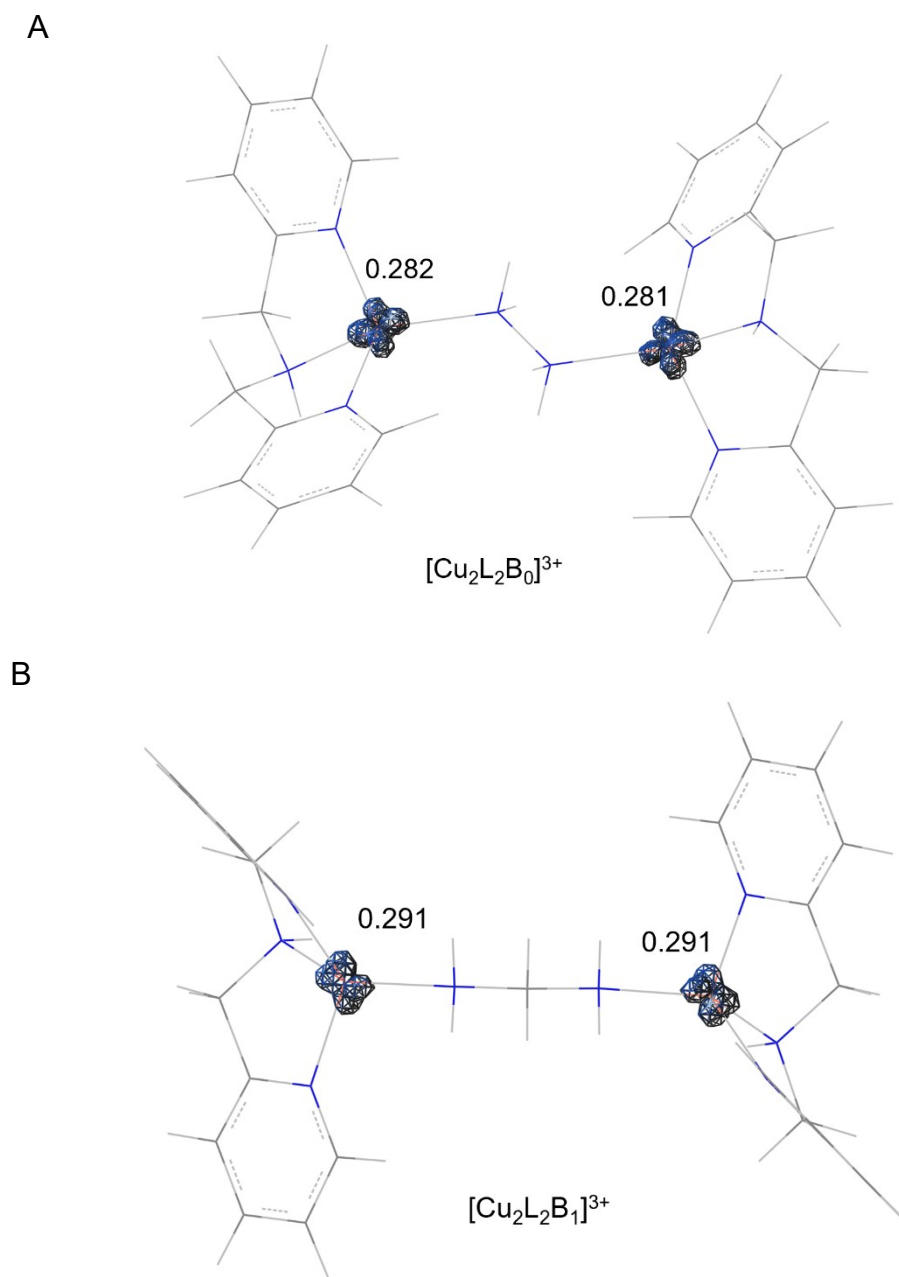

C

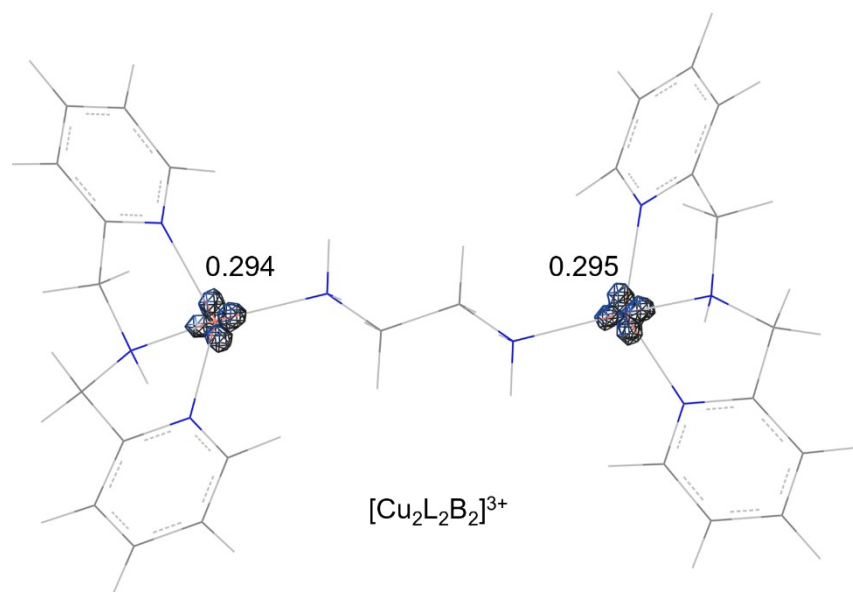

D

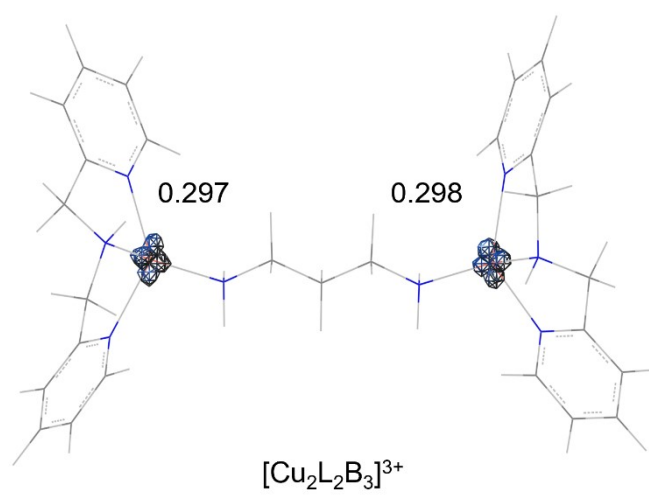

E

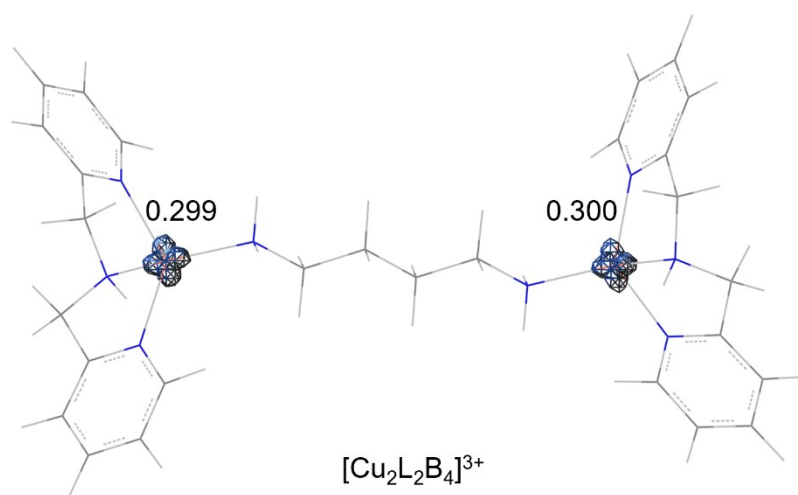

F

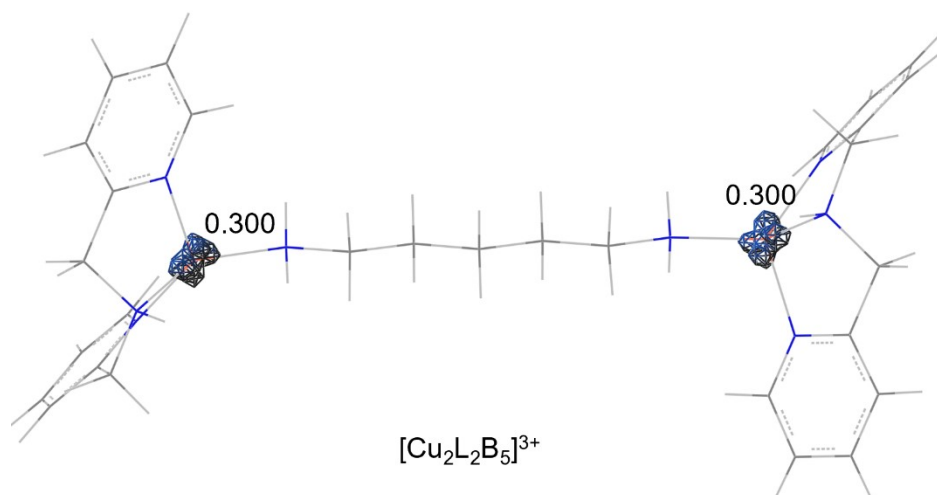

G

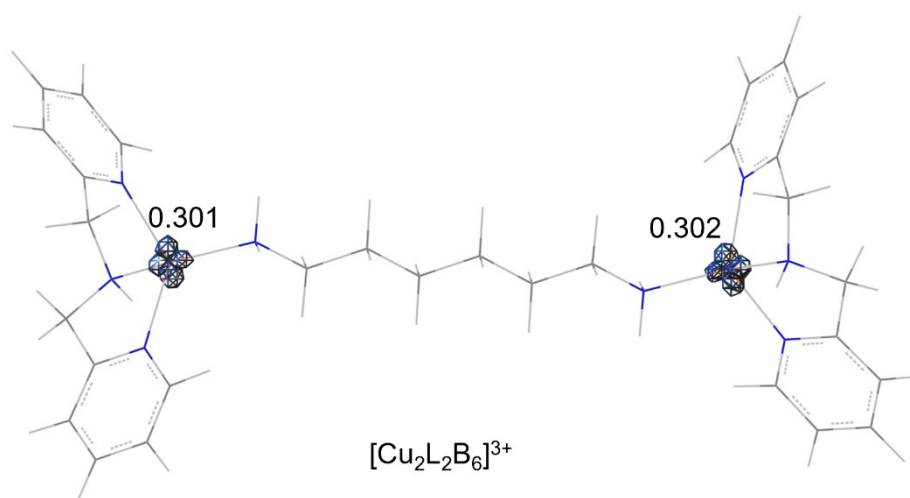

H

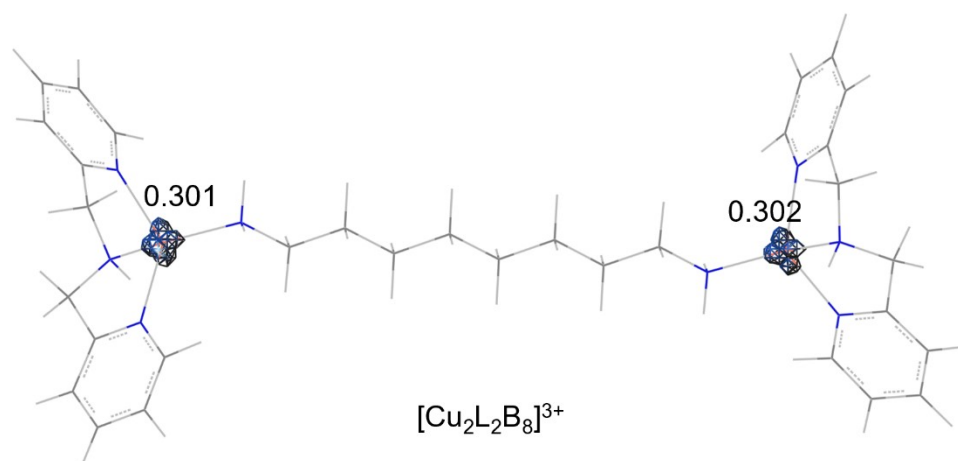

I

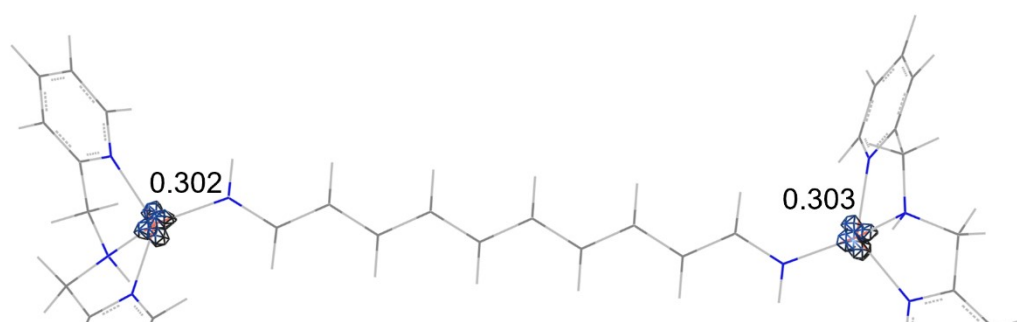

**Figure S2.** Spin density plots for A)  $[\text{Cu}_2\text{L}_2\text{B}_0]^{3+}$ , B)  $[\text{Cu}_2\text{L}_2\text{B}_1]^{3+}$ , C)  $[\text{Cu}_2\text{L}_2\text{B}_2]^{3+}$ , D)  $[\text{Cu}_2\text{L}_2\text{B}_3]^{3+}$ , E)  $[\text{Cu}_2\text{L}_2\text{B}_4]^{3+}$ , F)  $[\text{Cu}_2\text{L}_2\text{B}_5]^{3+}$ , G)  $[\text{Cu}_2\text{L}_2\text{B}_6]^{3+}$ , H)  $[\text{Cu}_2\text{L}_2\text{B}_8]^{3+}$  and I)  $[\text{Cu}_2\text{L}_2\text{B}_{10}]^{3+}$ . Spin populations are shown next to the Cu centers.

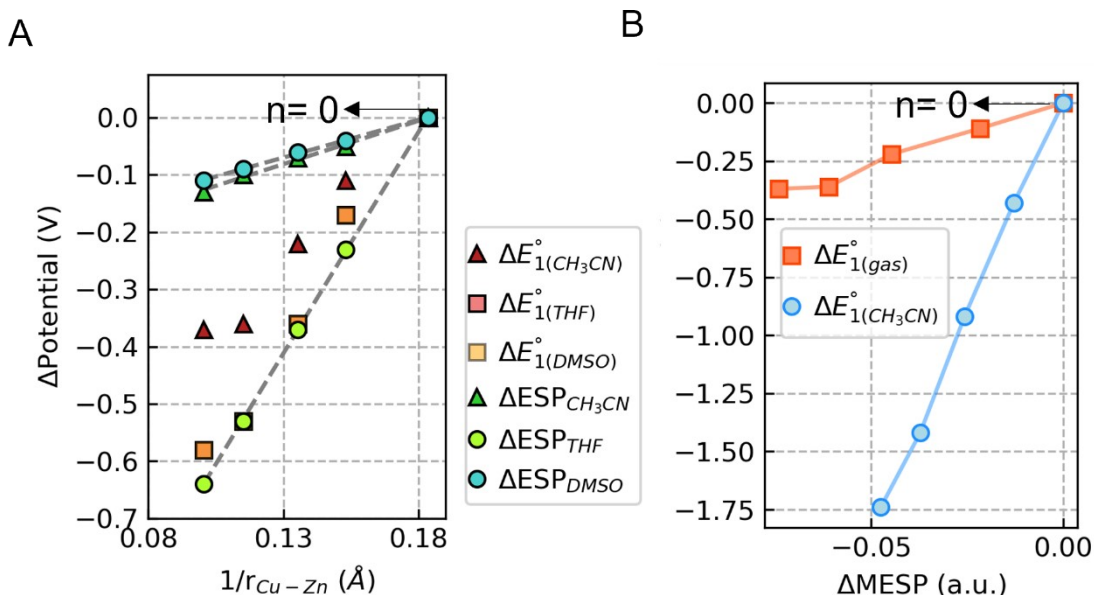

**Figure S3.** Electrostatic contributions to the calculated reduction potentials for  $[\text{CuZnL}_2\text{B}_n]^{4+}$  in (A) CH<sub>3</sub>CN, THF and DMSO. (B) Correlation between redox potentials (in CH<sub>3</sub>CN) with MESP values at the Cu center (where  $n = 0-4$ ).

**Table S1.** Absolute MESP values for  $[\text{Cu}_2\text{L}_2\text{B}_n]^{4+}$  and  $[\text{CuZnL}_2\text{B}_n]^{4+}$  with  $n=0-4$  in the gas phase and CH<sub>3</sub>CN.

| n | Cu-Cu (MESP in a.u.) |                    | Zn-Cu (MESP in a.u.) |                    |
|---|----------------------|--------------------|----------------------|--------------------|
|   | Gas                  | CH <sub>3</sub> CN | Gas                  | CH <sub>3</sub> CN |
| 0 | -25.7745             | -25.6804           | -25.7640             | -25.6708           |
| 1 | -25.7775             | -25.6909           | -25.7769             | -25.6926           |
| 2 | -25.7898             | -25.7127           | -25.7897             | -25.7155           |
| 3 | -25.8011             | -25.7297           | -25.8013             | -25.7319           |
| 4 | -25.8111             | -25.7435           | -25.8115             | -25.7449           |

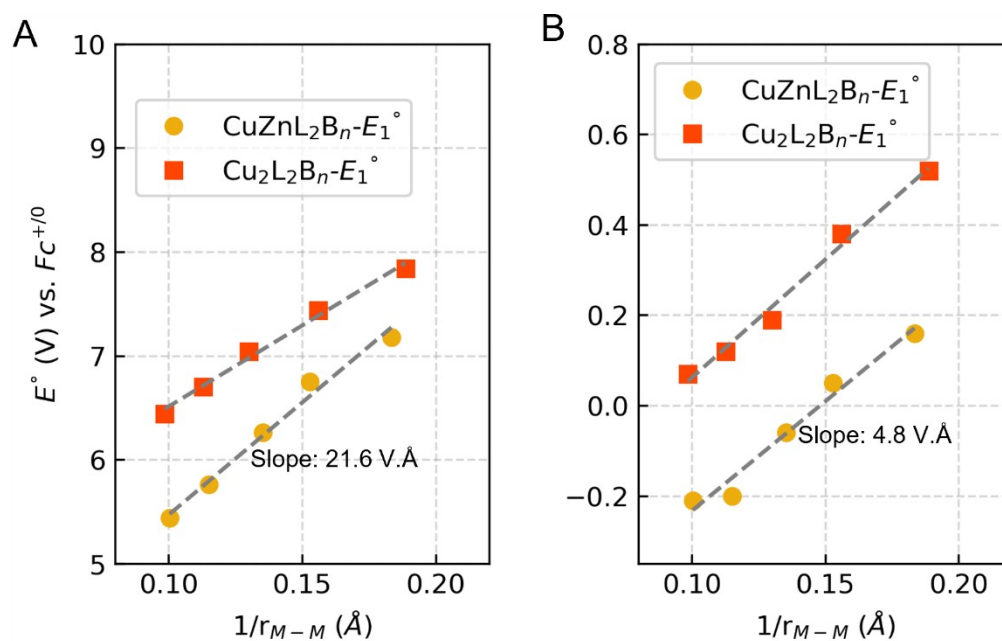

**Figure S4.** Comparison of the linear fits of the computed reduction potentials for  $[\text{Cu}_2\text{L}_2\text{B}_n]^{4+}$  (orange) and  $[\text{CuZnL}_2\text{B}_n]^{4+}$  (yellow) versus  $1/r_{M-M}$  (A) Gas phase (B) SMD( $\text{CH}_3\text{CN}$ )

A

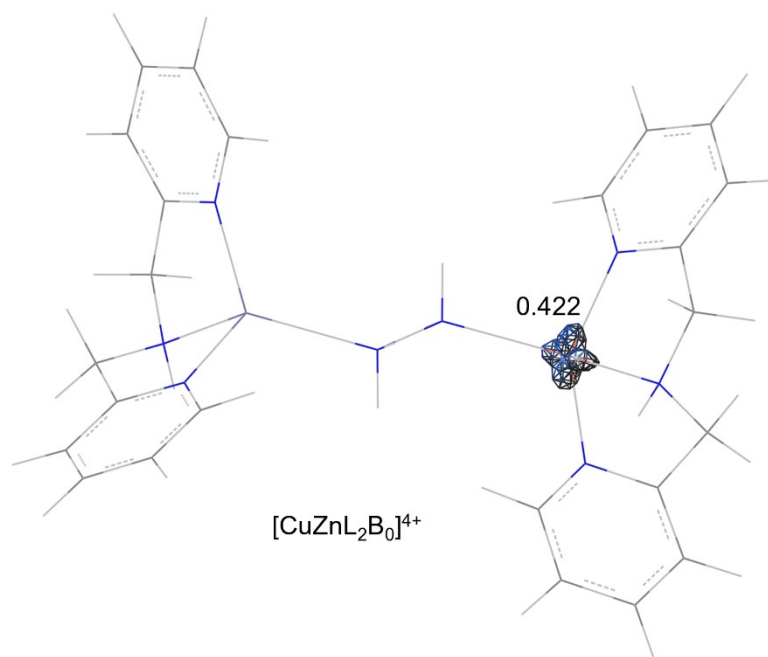

B

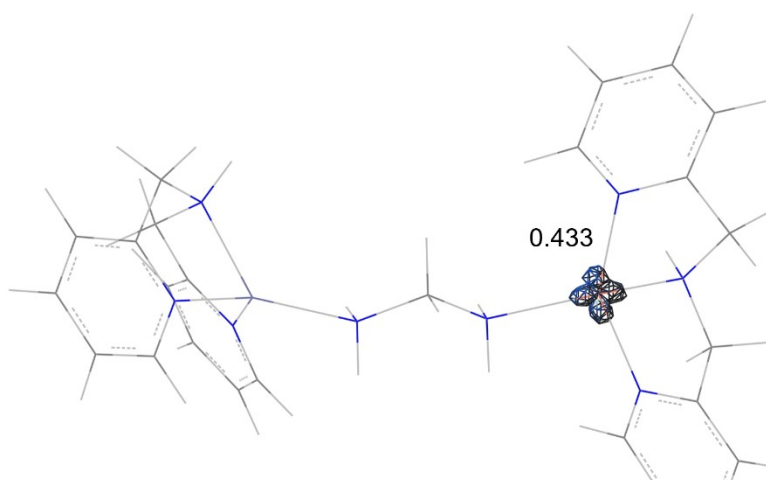

C

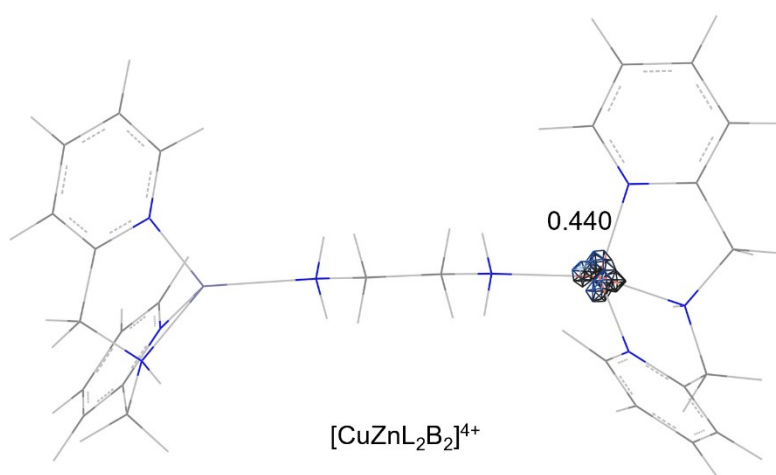

D

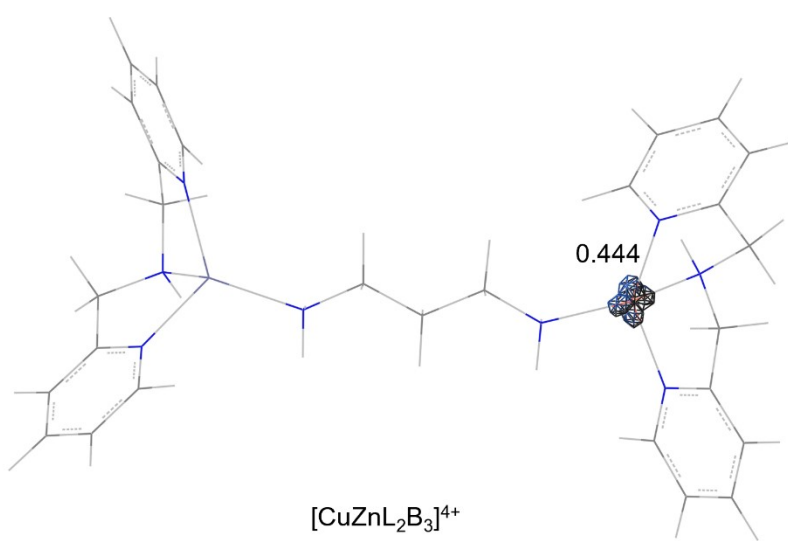

E

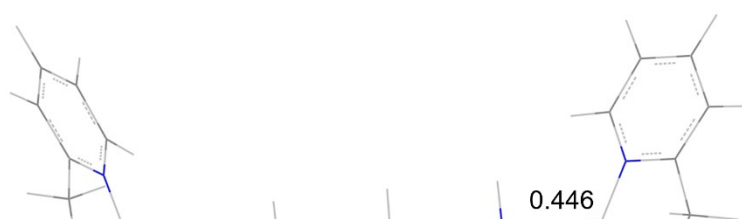

**Figure S5.** Spin density plots for A)  $[\text{CuZnL}_2\text{B}_0]^{4+}$ , B)  $[\text{CuZnL}_2\text{B}_1]^{4+}$ , C)  $[\text{CuZnL}_2\text{B}_2]^{4+}$ , D)  $[\text{CuZnL}_2\text{B}_3]^{4+}$  and E)  $[\text{CuZnL}_2\text{B}_4]^{4+}$ . Corresponding spin populations are indicated.

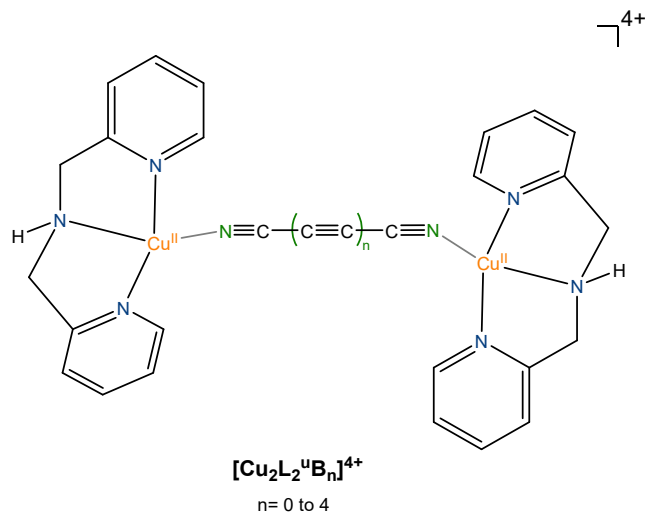

**Scheme S1.** A model bimetallic system with a conjugated, alkyne diamine linker, denoted by  $[\text{Cu}_2\text{L}_2^u\text{B}_n]^{4+}$  ('u' = unsaturated).

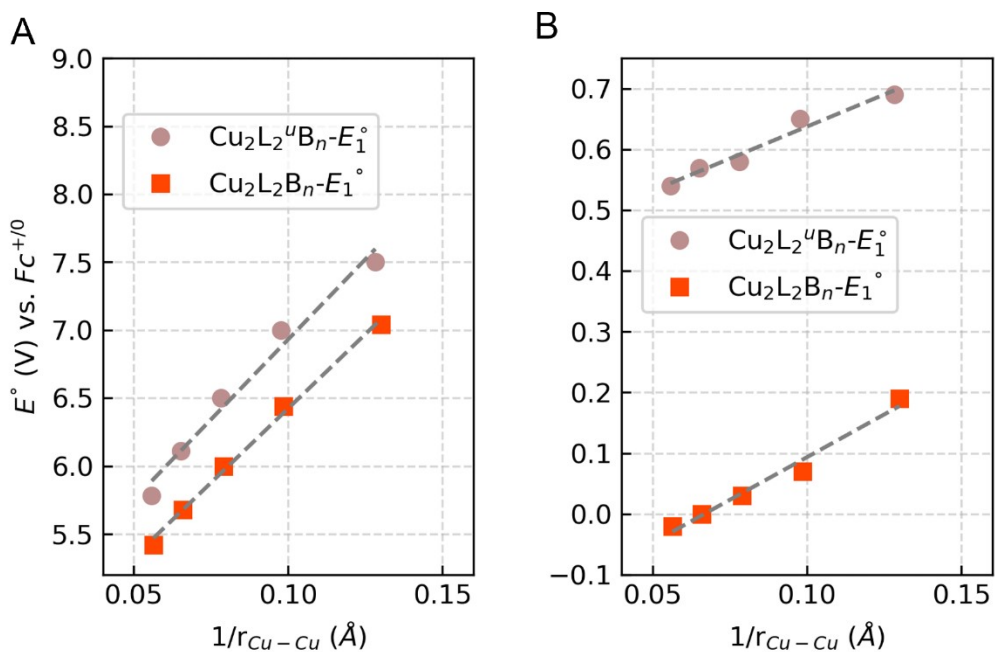

**Figure S6.** Comparison of the linear fits of the computed reduction potentials for  $[\text{Cu}_2\text{L}_2\text{B}_n]^{4+}$



(orange) and  $[\text{Cu}_2\text{L}_2^*\text{B}_n]^{4+}$  (brown) versus  $1/r_{\text{Cu-Cu}}$  in the (A) gas phase, and in (B) SMD( $\text{CH}_3\text{CN}$ ).

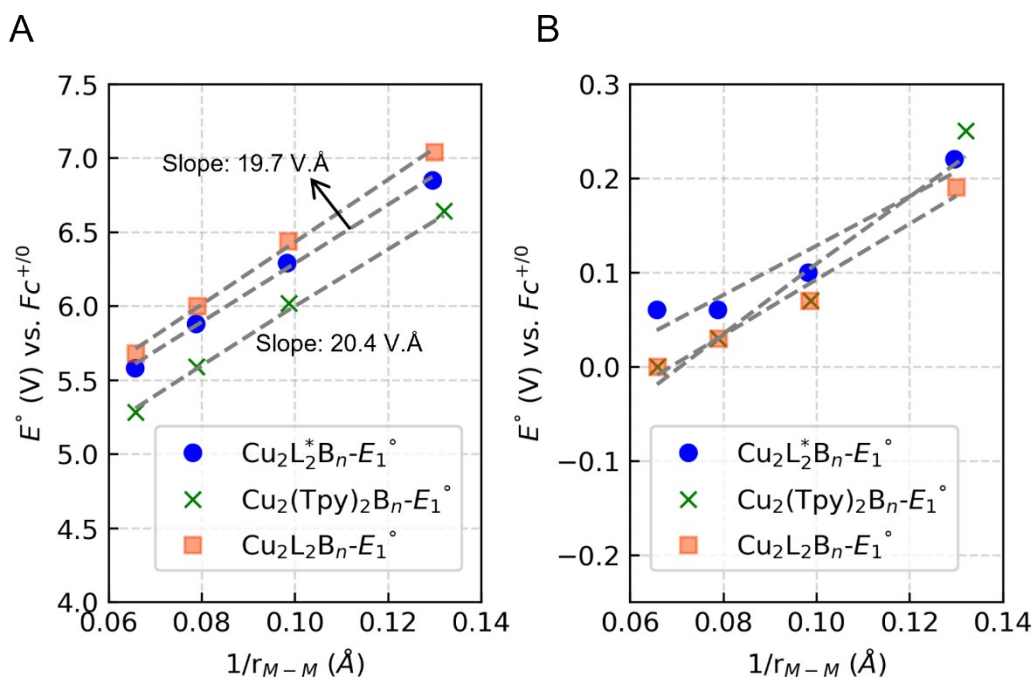

**Figure S7.** Effect of change in coordination sphere on  $E_1^\circ$  vs  $1/r_{\text{M-M}}$  in the (A) gas phase, and (B) SMD( $\text{CH}_3\text{CN}$ ); where DPA ( $L$ ) in  $\text{Cu}_2\text{L}_2\text{B}_n$  is replaced by N-methyl-bis(2-pyridyl methyl) amine ( $L^*$ ), or by 2,2':6',2''-Terpyridine (Tpy).

**Table S2.** Comparison of bond distances (in Å) between the single crystal structure and the DFT optimised geometry for  $[\text{Cu}_2\text{L}_2\text{B}_4]^{4+}$  and  $[\text{Cu}_2\text{L}_2\text{B}_8]^{4+}$ .

| S. No. | Bond   | $[\text{Cu}_2\text{L}_2\text{B}_4](\text{ClO}_4)_4$ |            | $[\text{Cu}_2\text{L}_2\text{B}_8](\text{ClO}_4)_4$ |            |
|--------|--------|-----------------------------------------------------|------------|-----------------------------------------------------|------------|
|        |        | <i>scXRD</i>                                        | <i>DFT</i> | <i>scXRD</i>                                        | <i>DFT</i> |
| 1      | Cu1-N1 | 1.978(4)                                            | 2.043      | 2.031(5)                                            | 2.047      |
| 2      | Cu1-N2 | 2.019(10)                                           | 2.062      | 2.014(7)                                            | 2.060      |
| 3      | Cu1-N3 | 1.985(4)                                            | 2.041      | 2.041(5)                                            | 2.042      |
| 4      | Cu1-N4 | 1.977(8)                                            | 2.104      | 2.003(5)                                            | 2.066      |

**Table S3.** Crystallographic information for the Cu complexes  $[\text{Cu}(\text{L})(\text{MeCN})](\text{ClO}_4)_2$ ,  $[\text{Cu}_2\text{L}_2\text{B}_4](\text{ClO}_4)_4$  and  $[\text{Cu}_2\text{L}_2\text{B}_8](\text{ClO}_4)_4$  [ $L$  = DPA].

| Identification code | $[\text{Cu}(\text{L})(\text{MeCN})](\text{ClO}_4)_2$          | $[\text{Cu}_2\text{L}_2\text{B}_4](\text{ClO}_4)_4$                       | $[\text{Cu}_2\text{L}_2\text{B}_8](\text{ClO}_4)_4$                          |
|---------------------|---------------------------------------------------------------|---------------------------------------------------------------------------|------------------------------------------------------------------------------|
| Empirical formula   | $\text{C}_{14}\text{H}_{16}\text{Cl}_2\text{CuN}_4\text{O}_8$ | $\text{C}_{28}\text{H}_{38}\text{Cl}_4\text{Cu}_2\text{N}_8\text{O}_{16}$ | $\text{C}_{36}\text{H}_{52}\text{Cl}_4\text{Cu}_2\text{N}_{10}\text{O}_{16}$ |
| Formula weight      | 502.75                                                        | 1011.54                                                                   | 1149.75                                                                      |
| Temperature/K       | 150.00(10)                                                    | 150.15                                                                    | 150(2)                                                                       |

|                                             |                                                               |                                                               |                                                               |
|---------------------------------------------|---------------------------------------------------------------|---------------------------------------------------------------|---------------------------------------------------------------|
| Crystal system                              | monoclinic                                                    | triclinic                                                     | monoclinic                                                    |
| Space group                                 | P2 <sub>1</sub> /c                                            | P-1                                                           | P2 <sub>1</sub> /c                                            |
| a/Å                                         | 8.3200(4)                                                     | 8.0801(13)                                                    | 17.628(4)                                                     |
| b/Å                                         | 31.0178(9)                                                    | 8.3872(14)                                                    | 8.5678(18)                                                    |
| c/Å                                         | 8.4615(4)                                                     | 16.325(3)                                                     | 15.791(3)                                                     |
| $\alpha$ /°                                 | 90                                                            | 82.830(4)                                                     | 90                                                            |
| $\beta$ /°                                  | 119.057(6)                                                    | 75.916(4)                                                     | 93.215(6)                                                     |
| $\gamma$ /°                                 | 90                                                            | 61.704(4)                                                     | 90                                                            |
| Volume/Å <sup>3</sup>                       | 1908.80(17)                                                   | 944.8(3)                                                      | 2381.2(8)                                                     |
| Z                                           | 4                                                             | 1                                                             | 2                                                             |
| $\rho_{\text{calc}}$ /cm <sup>3</sup>       | 1.749                                                         | 1.778                                                         | 1.604                                                         |
| $\mu$ /mm <sup>-1</sup>                     | 1.476                                                         | 1.492                                                         | 1.196                                                         |
| F(000)                                      | 1020                                                          | 516.0                                                         | 1184.0                                                        |
| Crystal size/mm <sup>3</sup>                | 0.102 × 0.063 × 0.054                                         | 0.413 × 0.321 × 0.158                                         | 0.097 × 0.071 × 0.054                                         |
| Radiation                                   | MoK $\alpha$ ( $\lambda$ = 0.71073)                           | MoK $\alpha$ ( $\lambda$ = 0.71073)                           | MoK $\alpha$ ( $\lambda$ = 0.71073)                           |
| 2 $\theta$ range for data collection/°      | 5.254 to 59.056                                               | 5.146 to 50.05                                                | 4.628 to 50.054                                               |
| Index ranges                                | -7 ≤ h ≤ 11, -34 ≤ k ≤ 41, -11 ≤ l ≤ 7                        | -8 ≤ h ≤ 9, -9 ≤ k ≤ 9, -18 ≤ l ≤ 19                          | -20 ≤ h ≤ 20, -10 ≤ k ≤ 10, -18 ≤ l ≤ 17                      |
| Reflections collected                       | 17329                                                         | 13716                                                         | 29525                                                         |
| Independent reflections                     | 4412 [R <sub>int</sub> = 0.0662, R <sub>sigma</sub> = 0.0732] | 3320 [R <sub>int</sub> = 0.1597, R <sub>sigma</sub> = 0.1580] | 4205 [R <sub>int</sub> = 0.1656, R <sub>sigma</sub> = 0.0973] |
| Data/restraints/parameters                  | 4412/0/263                                                    | 3320/15/248                                                   | 4205/67/331                                                   |
| Goodness-of-fit on F <sup>2</sup>           | 1.049                                                         | 1.052                                                         | 1.053                                                         |
| Final R indexes [I ≥ 2 $\sigma$ (I)]        | R <sub>1</sub> = 0.0556, wR <sub>2</sub> = 0.1206             | R <sub>1</sub> = 0.1010, wR <sub>2</sub> = 0.2081             | R <sub>1</sub> = 0.0689, wR <sub>2</sub> = 0.1601             |
| Final R indexes [all data]                  | R <sub>1</sub> = 0.0928, wR <sub>2</sub> = 0.1394             | R <sub>1</sub> = 0.1672, wR <sub>2</sub> = 0.2360             | R <sub>1</sub> = 0.1207, wR <sub>2</sub> = 0.1895             |
| Largest diff. peak/hole / e Å <sup>-3</sup> | 0.74/-0.85                                                    | 1.21/-0.83                                                    | 0.67/-0.73                                                    |

A

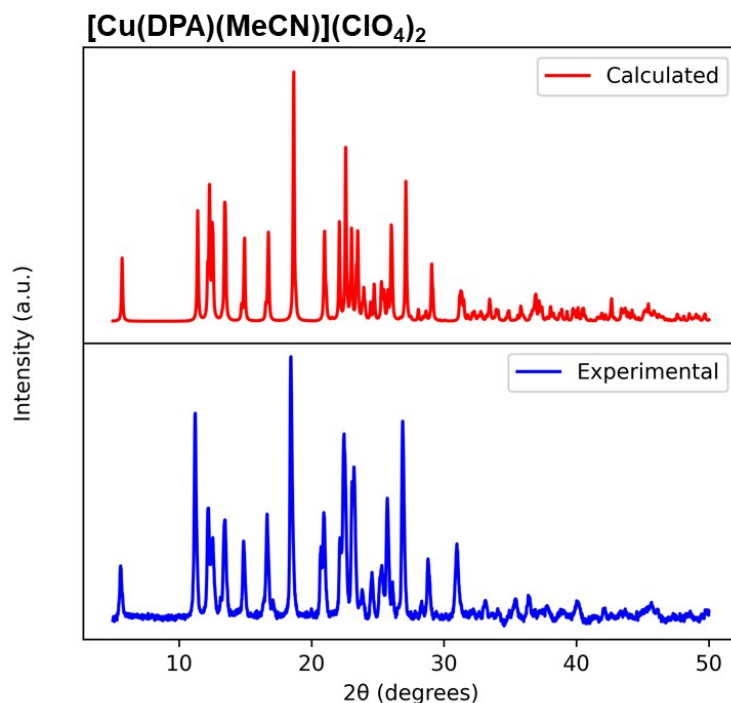

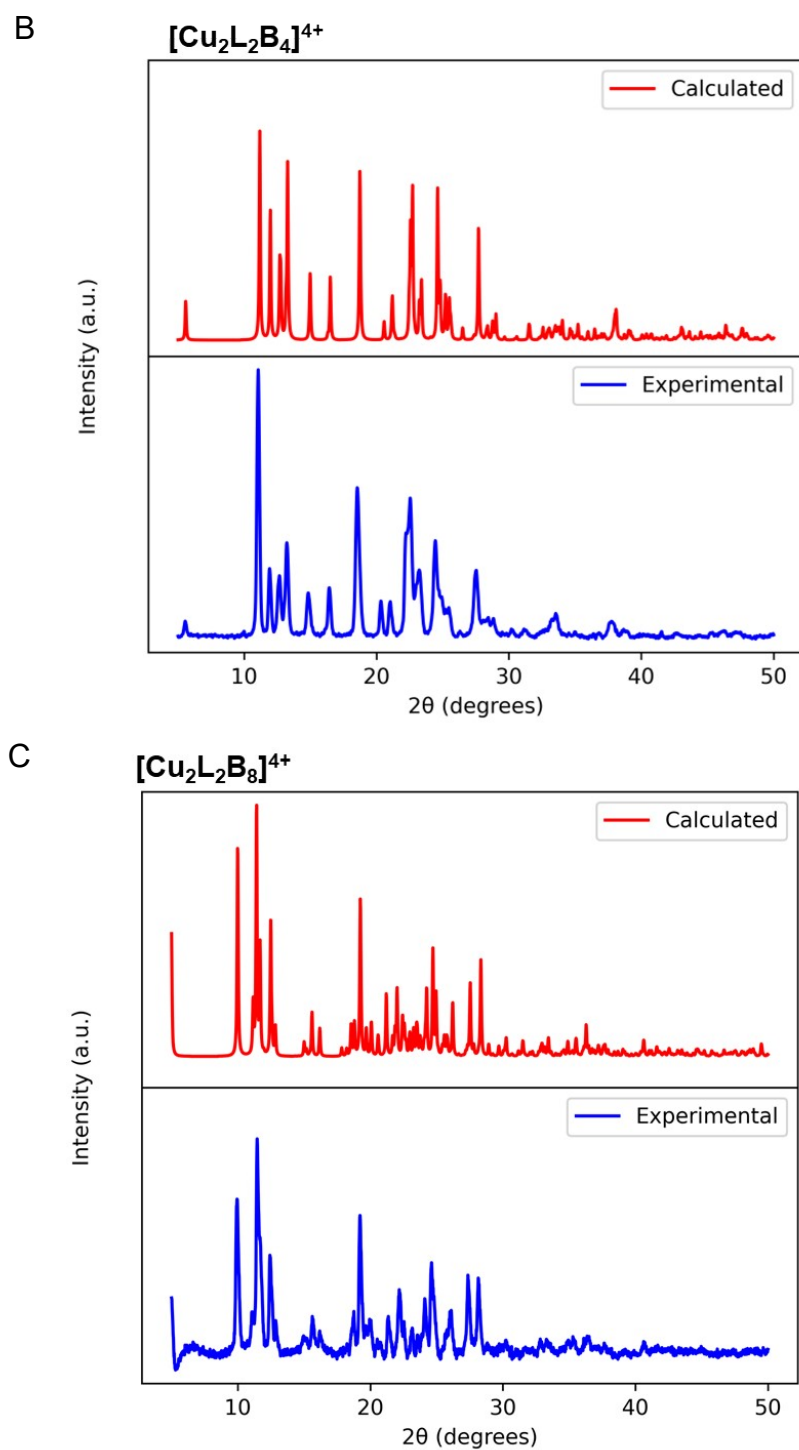

**Figure S8.** Calculated and experimental powder PXRD diffraction patterns for A)  $[\text{Cu}(\text{DPA})(\text{MeCN})](\text{ClO}_4)_2$ , B)  $[\text{Cu}_2\text{L}_2\text{B}_4](\text{ClO}_4)_4$  and C)  $[\text{Cu}_2\text{L}_2\text{B}_8](\text{ClO}_4)_4$ .

# Compound Details

Cpd. 1: C12 H13 Cl Cu N3 O4

| Formula             | m/z      | Observed M/Z    | Difference Da       | Difference PPM      | Score |
|---------------------|----------|-----------------|---------------------|---------------------|-------|
| C12 H13 Cl Cu N3 O4 | 360.9882 | 360.98821534461 | -0.0146878339251089 | -0.0406877536735364 | 95.13 |

## Compound Spectra (Zoomed)

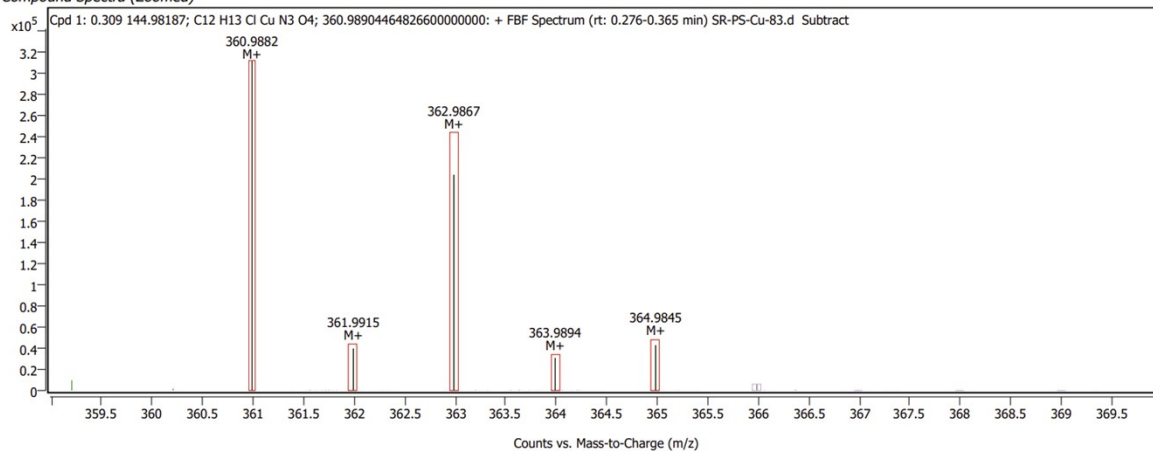

**Figure S9.** ESI-HRMS data for  $[\text{Cu}(\text{DPA})(\text{MeCN})](\text{ClO}_4)_2$

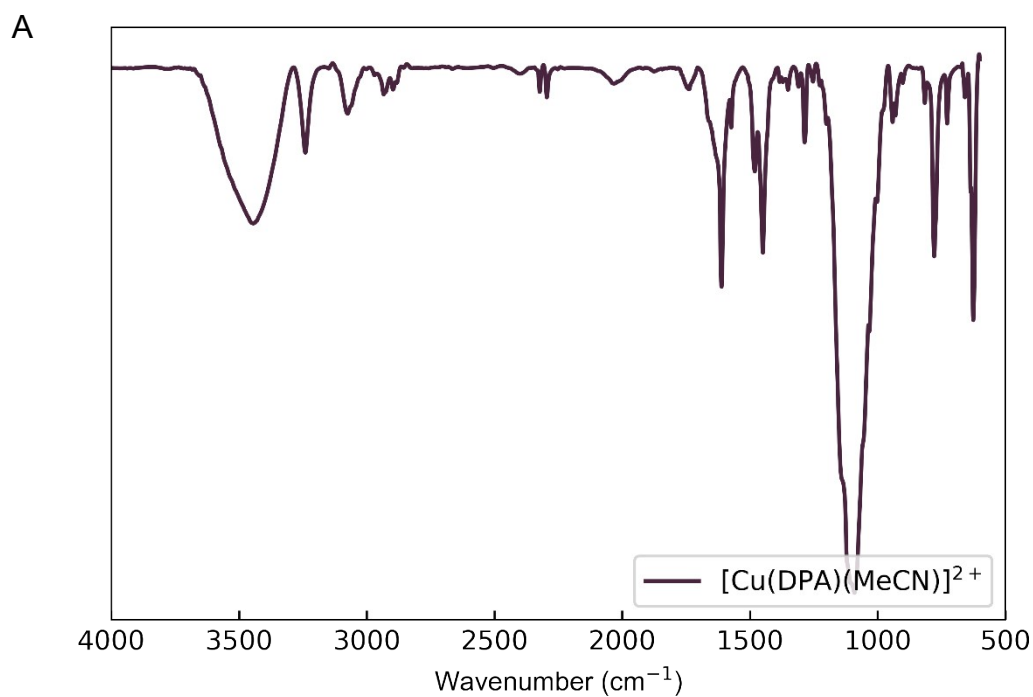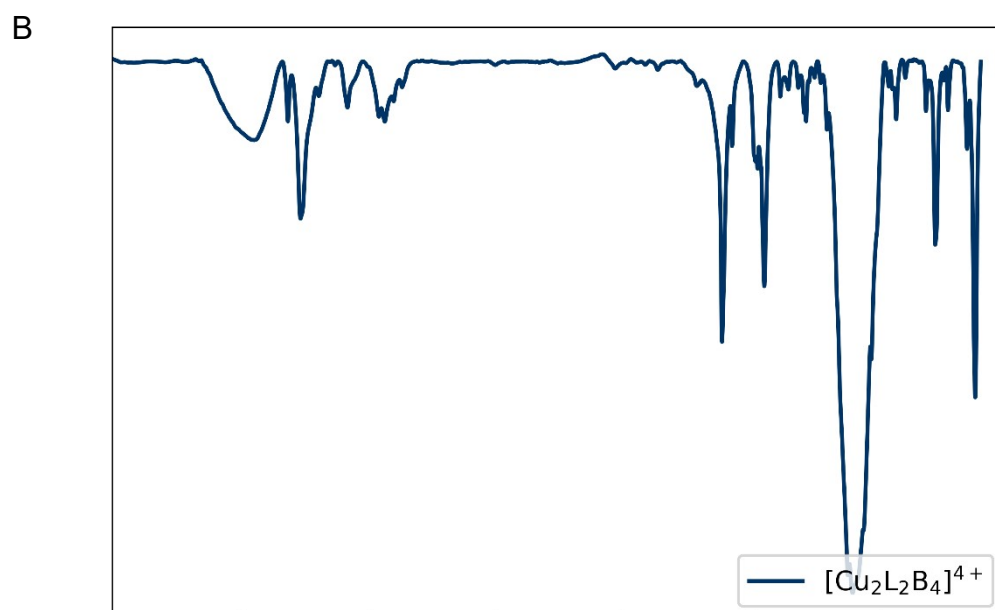

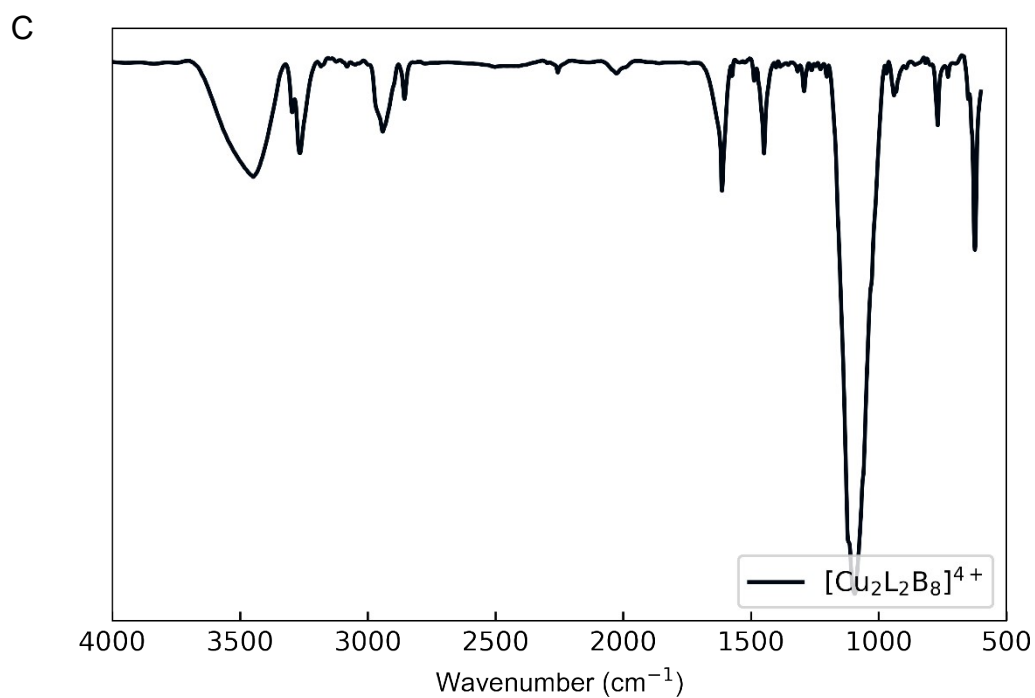

**Figure S10.** FTIR spectra of A)  $[\text{Cu}(\text{DPA})(\text{MeCN})](\text{ClO}_4)_2$ , B)  $[\text{Cu}_2\text{L}_2\text{B}_4](\text{ClO}_4)_4$  and C)  $[\text{Cu}_2\text{L}_2\text{B}_8](\text{ClO}_4)_4$ .

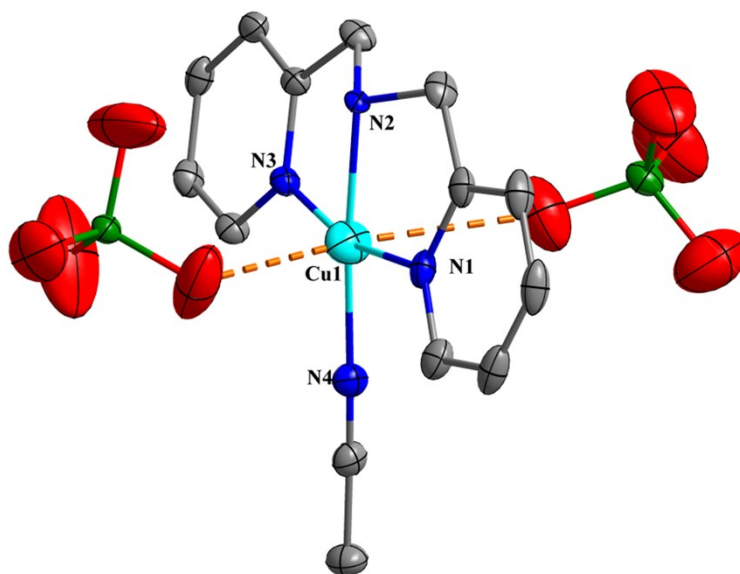

**Figure S11.** scXRD structure for  $[\text{Cu}(\text{DPA})(\text{MeCN})](\text{ClO}_4)_2$



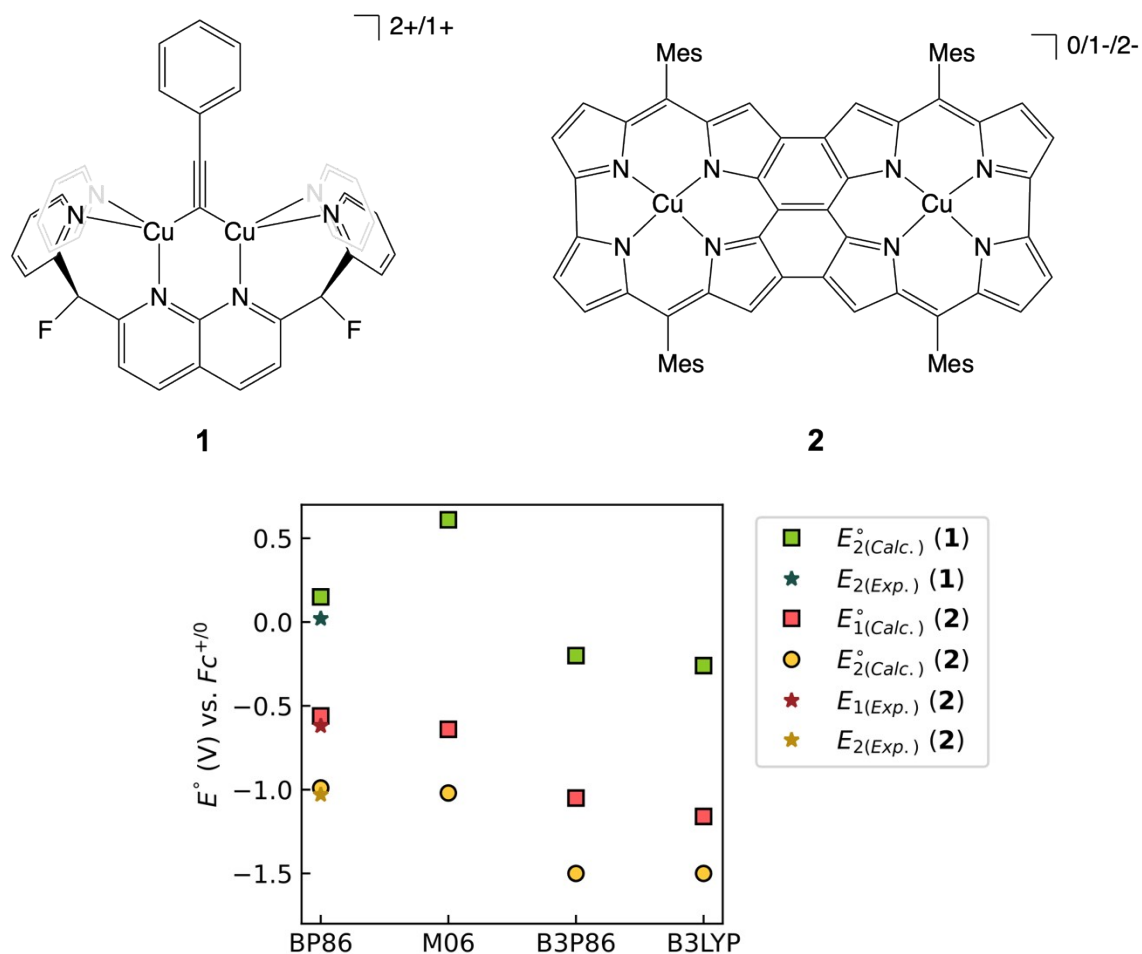

**Figure S12.** Benchmarking of reduction potential calculations: DFT-computed  $E_1^0$  and  $E_2^0$  with different density functionals against experimentally determined reduction potentials for two analogous systems, viz. a dicopper  $\mu$ -alkynyl complex<sup>[11]</sup> (**1**), and a dicopper corrole complex<sup>[12]</sup> (**2**).

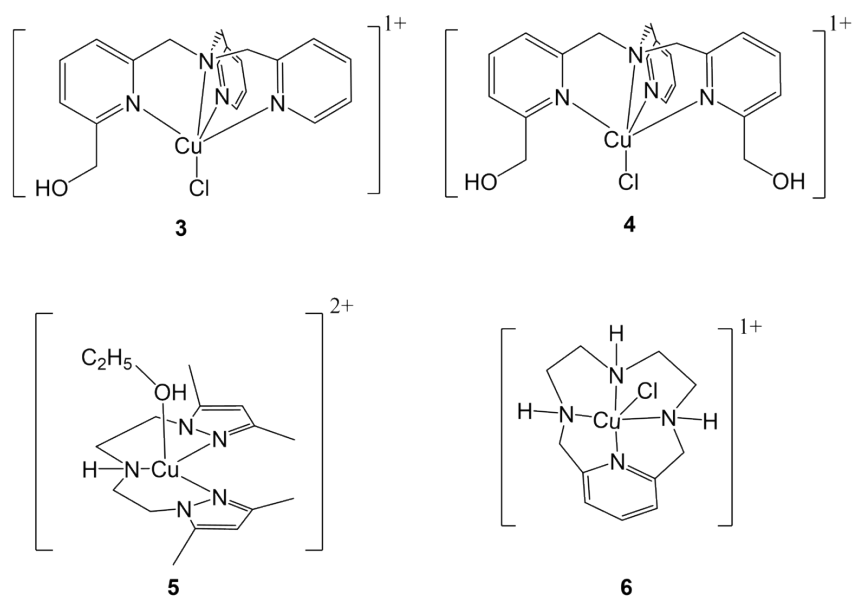

**Scheme S2.** Structures of monomeric Cu(II) complexes **3**,<sup>[13]</sup>**4**,<sup>[13]</sup>**5**,<sup>[14]</sup> and **6**,<sup>[15]</sup> used for benchmarking

the DFT methods.

**Table S4.** Functional dependence of the DFT-computed redox potentials (vs.  $\text{Fc}^{+/0}$ ) for the systems listed in Scheme S2. All the measured  $E_{1/2}$  values were reported in  $\text{CH}_3\text{CN}$ , unless otherwise noted.

| System # | Experimental $E_{1/2}$ (in V) | Density Functional |       |       |       |
|----------|-------------------------------|--------------------|-------|-------|-------|
|          |                               | BP86               | M06   | B3P86 | B3LYP |
| 3        | -0.51                         | -0.51              | -0.14 | -0.99 | -0.97 |
| 4        | -0.36                         | -0.45              | -0.06 | -0.93 | -0.87 |
| 5        | 0.10                          | 0.21               | 0.37  | -0.41 | -0.42 |
| 6        | -0.96*                        | -0.85              | -0.47 | -1.35 | -1.26 |

\*both the experimental and computed values are in DMF.

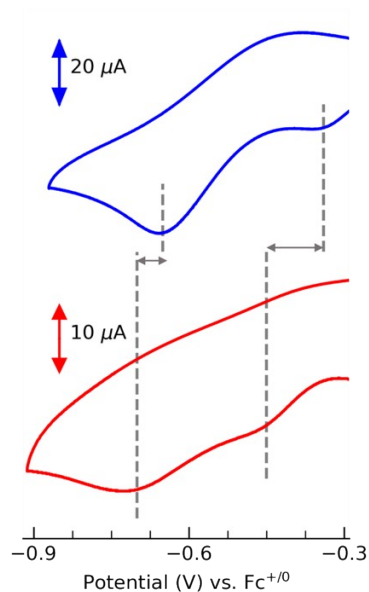

**Figure S13.** Cyclic voltammogram of 4 mM solutions of  $[\text{Cu}_2\text{L}_2\text{B}_4]^{4+}$  (blue) and  $[\text{Cu}_2\text{L}_2\text{B}_8]^{4+}$  (red) in acetonitrile with a wider potential window. Scan rate = 100 mV/s.



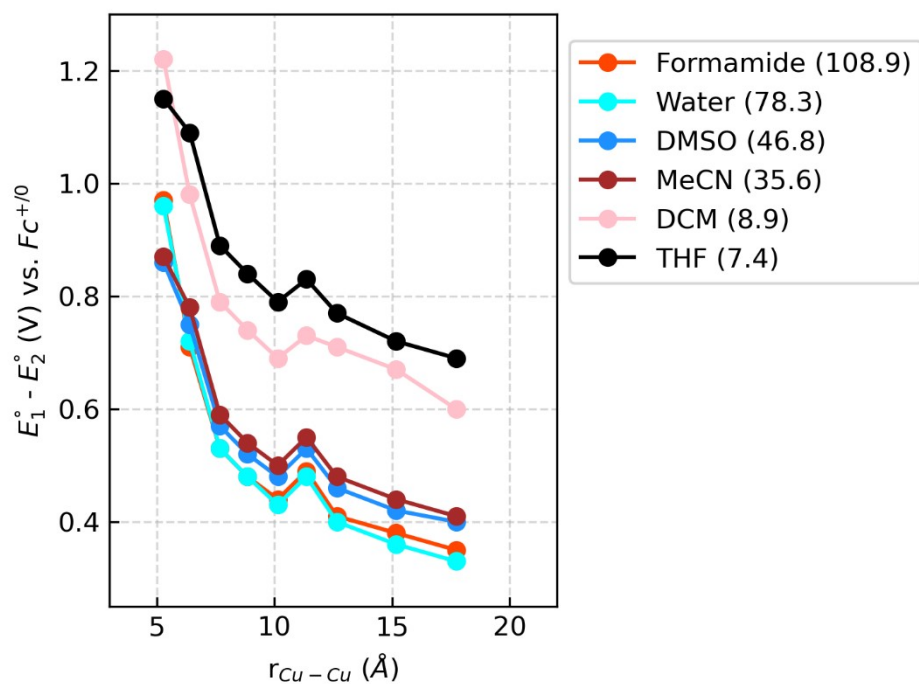

**Figure S14.** Influence of different dielectrics on  $E_1^\circ - E_2^\circ$  as a function of  $r_{Cu-Cu}$  using the SMD solvation model.

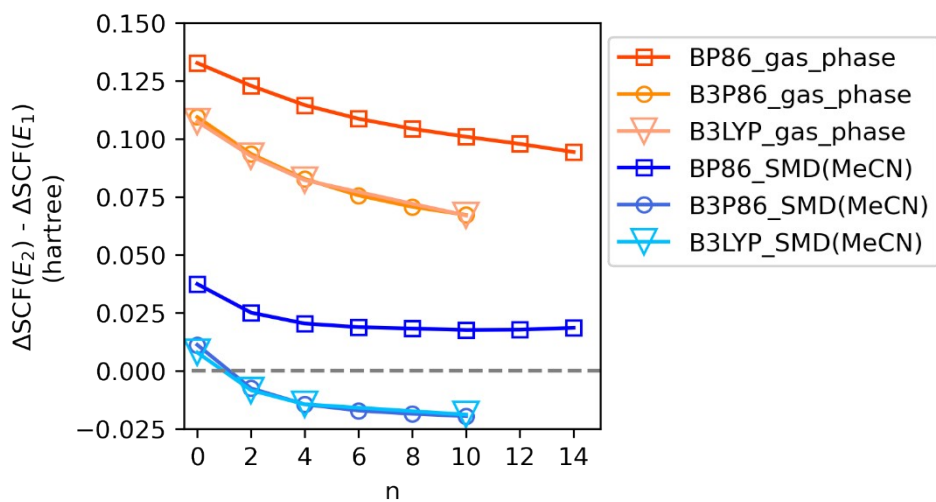

**Figure S15.** Dependence of  $\Delta SCF$  energies as a function of  $n$  for the first and second reduction of  $[Cu_2L_2B_n]^{4+}$  on the density functional.
